# Supplementary material for: Changes in Medicago truncatula seed proteome along the rehydration–dehydration cycle highlight new players in the genotoxic stress response
Source: Front Plant Sci. 2023 Jun 13;14:1188546. doi: 10.3389/fpls.2023.1188546 (PMC10319343; doi:10.3389/fpls.2023.1188546)
Supplement: Supplementary file 1 [file Table_1.xlsx]

## Sheet: Diff. Accum. Detect.
Differentially accumulated
Gene Accession	proteinID	Protein Name	DS vs P	P vs PDB2	DS vs PDB4	PDB2 vs PDB4	PDB4 vs PRH2	PRH2 vs PRH8	DS vs UP2	UP2 vs PRH2	UP8 vs PRH8	UP2 vs UP8	Detected in:	Pairwise Comparison	Log2FC	Adj.P-val	Transition	Transition Description
MtrunA17_Chr7g0235661	RHN45824.1	hypothetical protein MtrunA17_Chr7g0235661	NA	NA	0.351836	-2.01658	0.00551005	6.93842	3.19506	-2.8494	NA	NA	PRH8 > PRH2	PRH2 vs PRH8	6.93842	0.0375133	PRH2 --> PRH8	Accumulated with late reimbibition
MTR_1g092670	XP_003591755.1	copper transport protein ATX1	-3.00248	1.78275	0.219166	1.45226	-4.62095	1.72181	-1.57379	-2.74676	NA	NA	PDB4 > PRH2	PDB4 vs PRH2	-4.62095	0.000601027	PDB4 --> PRH2	Depleted with early reimbibition
MTR_2g042450	XP_003595318.2	methylthioribose-1-phosphate isomerase	-1.25667	1.72119	-2.55637	-3.03962	2.25787	0.0612994	0.180997	-0.494063	-0.600833	0.183956	PDB2 > PDB4	PDB2 vs PDB4	-3.03962	0.0082831	PDB2 --> PDB4	Depleted with late desiccation
MTR_8g072010	XP_003628996.1	pectin acetylesterase 8	-0.928012	-3.17103	-1.40407	2.71389	-0.508082	1.04804	-1.29075	-0.573655	2.8732	-2.38146	PDB4 > PDB2	PDB2 vs PDB4	2.71389	0.0082831	PDB2 --> PDB4	Accumulated with late desiccation
MTR_4g120940	XP_013458291.2	ABA-responsive protein ABR18	1.15955	-1.03028	0.538131	0.373738	-0.87715	4.3008	0.098967	-0.440249	0.882136	2.96701	PRH8 > PRH2	PRH2 vs PRH8	4.3008	0.0121443	PRH2 --> PRH8	Accumulated with late reimbibition
MTR_6g003970	XP_024641602.1	elongation factor Ts, mitochondrial isoform X2	-1.84905	9.43855	NA	NA	-1.03262	NA	NA	-3.33345	NA	-3.9745	PDB2 > P	P vs PDB2	9.43855	0.00170541	P --> PDB2	Accumulated with early desiccation
Differentially detected (detected only one condition of a given pairwise comparison)
Gene Accession	proteinID	Protein Name	DS vs P	P vs PDB2	DS vs PDB4	PDB2 vs PDB4	PDB4 vs PRH2	PRH2 vs PRH8	DS vs UP2	UP2 vs PRH2	UP8 vs PRH8	UP2 vs UP8	Detected in:	Pairwise Comparison	Log2 pseudo-FC	Adj. pseudo P-val	Transition	Transition Description	Detected in:	Pairwise Comparison	Log2 pseudoFC	Adj.pseudoP-val	Transition	Transition Description
MTR_4g099290	A0A072UP44	A0A072UP44_MEDTR	0.0610109	0.364119	0.404698	-0.0783004	0.771625	-0.982329	0.590435	0.558375	NA	-0.102484	UP2	UP2 vs UP8	-0.102484	0	UP2 --> UP8	Depleted with late imbibition
MTR_3g111970	A0A072V3B6	2V3B6|A0A072V3B6_MEDTR	-0.0304248	NA	-0.994471	NA	NA	-0.493577	0.291279	0.412643	-0.352295	0.305466	DS	DS vs PDB4	-0.994471	0	DS --> PDB4	Depleted after priming
MTR_8g027715	RHN39729.1	putative monogalactosyldiacylglycerol synthase	-0.690513	NA	NA	NA	-0.303321	-0.668747	NA	0.254293	NA	NA	PRH2	PRH2 vs PRH8	-0.668747	0	PRH2 --> PRH8	Depleted with late reimbibition
MTR_6g083760	RHN52770.1	glycerophosphodiester phosphodiesterase, protein kinase RLK-Pelle-LRK10L-2 family	NA	NA	-1.08703	3.13273	0.336246	0.0792088	-1.9839	1.25408	1.69996	-0.328631	PDB4	PDB2 vs PDB4	3.13273	0	PDB2 --> PDB4	Accumulated with late desiccation
MTR_1g030290	XP_003589582.1	long chain acyl-CoA synthetase 9	-0.130182	NA	0.743406	NA	-0.169941	-0.575553	NA	0.666137	0.927614	NA	PRH2	UP2 vs PRH2	0.666137	0	UP2 --> PRH2	Detected in primed seeds
MTR_1g086170	XP_003591315.1	uncharacterized protein LOC11426606	NA	NA	0.0913325	1.05237	-1.05763	0.418225	0.413182	-1.37462	0.421281	-1.36208	PDB4	PDB2 vs PDB4	1.05237	0	PDB2 --> PDB4	Accumulated with late desiccation
MTR_1g094980	XP_003591896.1	uncharacterized protein LOC11422976 isoform X2	NA	NA	0.794705	0.130721	NA	NA	0.0651545	-0.453975	0.620835	-0.0949471	UP2	UP2 vs PRH2	-0.453975	0	UP2 --> PRH2	Detected in unprimed seeds
MTR_2g013120	XP_003593527.1	acetolactate synthase 3, chloroplastic	-0.618935	-0.162426	-1.53804	-0.754878	NA	-0.388003	-0.959777	0.124348	-0.1961	-0.0809709	DS	DS vs PDB4	-1.53804	0	DS --> PDB4	Depleted after priming	PDB2	PDB2 vs PDB4	-0.754878	0	PDB2 --> PDB4	Depleted with late desiccation
MTR_2g013440	XP_003593563.1	stress-related protein	0.922919	-0.028296	-0.809754	-1.73155	2.01492	0.290562	NA	2.09715	0.860543	1.48044	PRH2	UP2 vs PRH2	2.09715	0	UP2 --> PRH2	Detected in primed seeds	UP8	UP2 vs UP8	1.48044	0	UP2 --> UP8	Accumulated with late imbibition
MTR_2g027090	XP_003594308.1	sister chromatid cohesion protein PDS5 homolog A-B	NA	NA	-0.0458065	NA	NA	NA	-0.272976	NA	NA	NA	DS	DS vs UP2	-0.272976	0	DS --> UP2	Depleted with early imbibition
MTR_3g007870	XP_003598153.1	probable L-type lectin-domain containing receptor kinase S.7	1.42934	-1.06271	-2.05754	NA	NA	0.083397	-0.517597	1.61021	-0.540484	2.25235	DS	DS vs PDB4	-2.05754	0	DS --> PDB4	Depleted after priming
MTR_3g020670	XP_003598766.1	xanthoxin dehydrogenase	NA	NA	NA	NA	-0.271664	0.0731274	NA	-0.364195	NA	NA	PRH2	PDB4 vs PRH2	-0.271664	0	PDB4 --> PRH2	Depleted with early reimbibition	PRH2	UP2 vs PRH2	-0.364195	0	UP2 --> PRH2	Detected in unprimed seeds
MTR_3g091460	XP_003602247.2	pentatricopeptide repeat-containing protein At3g49240	NA	-1.14336	NA	NA	NA	1.39815	NA	NA	0.419977	-0.238655	UP8	UP2 vs UP8	-0.238655	0	UP2 --> UP8	Depleted with late imbibition
MTR_4g030140	XP_003605375.1	dynamin-2B	NA	1.50508	-0.774187	-0.879912	0.690892	-0.478922	-0.616666	0.541844	0.0185747	0.0497691	PDB2	P vs PDB2	1.50508	0	P --> PDB2	Accumulated with early desiccation
MTR_4g132320	XP_003610452.1	L-ascorbate oxidase homolog	-0.424523	NA	-0.435788	NA	NA	NA	0.442524	-0.191479	0.0974435	-0.436407	DS	PDB4 vs DS	-0.435788	0	DS --> PDB4	Depleted after priming
MTR_5g094120	XP_003617666.2	cell division protein FtsZ homolog 1	0.130949	-0.222626	0.517897	0.592642	-0.194412	-0.495244	0.0585786	0.243545	NA	-0.467129	UP2	UP8 vs UP2	-0.467129	0	UP2 --> UP8	Depleted with late imbibition
MTR_7g093260	XP_003625265.1	actin-3	NA	-0.655207	NA	-2.06638	NA	NA	NA	NA	NA	NA	PDB2	PDB2 vs PDB4	-2.06638	0	PDB2 --> PDB4	Depleted with late desiccation
MTR_7g099960	XP_003625510.1	probable histone H2B.3	0.83159	-0.27897	NA	0.0307376	NA	-0.468304	0.943441	-0.304587	-1.03389	0.306533	PDB2	PDB2 vs PDB4	0.0307376	0	PDB2 --> PDB4	Accumulated with late desiccation
MTR_7g113660	XP_003626302.1	mevalonate kinase	NA	NA	NA	NA	1.23143	-0.561239	0.179756	0.49655	-0.509657	0.505118	PRH2	PDB4 vs PRH2	1.23143	0	PDB4 --> PRH2	Accumulated with early reimbibition
MTR_8g028225	XP_013444720.1	malate synthase, glyoxysomal	0.53155	-0.774161	0.467211	0.706524	0.290017	1.73308	0.289355	0.461679	0.0496872	2.12523	UP8	UP2 vs UP8	2.125	0.0515222	UP2 --> UP8	Accumulated with late imbibition
MTR_7g105850	XP_013450184.1	probable aspartyl protease At4g16563	0.244877	NA	-0.1748	-0.271659	0.406392	-0.0855046	-0.977345	NA	0.0620695	1.10332	PDB4	PDB2 vs PDB4	-0.271659	0	PDB2 --> PDB4	Depleted with late desiccation
MTR_4g459450	XP_013456018.1	uncharacterized protein LOC25494424	0.125838	0.652765	0.153649	NA	NA	0.439891	-0.664955	NA	0.529342	NA	DS	DS vs UP2	-0.664955	0	DS --> UP2	Depleted with early imbibition
MTR_2g024420	XP_013462901.1	plant UBX domain-containing protein 4	-1.13254	-0.446621	-0.619794	0.916105	-1.95898	-0.000226458	-0.467024	-2.08749	NA	NA	PRH2	PRH2 vs PRH8	-0.000226458	0	PRH2 --> PRH8	Depleted with late reimbibition
MTR_2g079420	XP_013464712.1	thioredoxin M4, chloroplastic	NA	-0.918099	NA	-0.954323	NA	NA	-0.900563	NA	NA	NA	PDB2	PDB2 vs PDB4	-0.954323	0	PDB2 --> PDB4	Depleted with late desiccation
MTR_2g090605	XP_013465134.1	zinc finger CCCH domain-containing protein 61	-0.337348	NA	-2.03377	NA	NA	NA	-1.0209	NA	NA	NA	DS	DS vs UP2	-1.0209	0	DS --> UP2	Depleted with early imbibition
MTR_1g038815	XP_013466908.1	RNA helicase aquarius isoform X1	NA	NA	-1.13055	-0.0903111	0.303381	1.29802	NA	0.759713	0.199914	NA	PRH2	UP2 vs PRH2	0.759713	0	UP2 --> PRH2	Detected in primed seeds
MTR_1g047390	XP_013467222.1	inosine triphosphate pyrophosphatase	-0.939096	0.399195	NA	NA	0.815166	0.3403	NA	0.696829	0.143893	NA	PRH2	PDB4 vs PRH2	0.815166	0	PDB4 --> PRH2	Accumulated with early reimbibition	PRH2	UP2 vs PRH2	0.696829	0	UP2 vs PRH2	Detected in primed seeds
MTR_1g062380	XP_013468088.1	UDP-glycosyltransferase 73C3	0.682531	-0.591886	-0.72948	-0.80388	NA	-0.674544	-0.376761	-0.0589759	-1.0193	0.241565	DS	DS vs PDB4	-0.72948	0	DS --> PDB4	Depleted after priming	PDB2	PDB2 vs PDB4	-0.80388	0	PDB2 --> PDB4	Depleted with late desiccation
MTR_1g069785	XP_013468472.1	probable methyltransferase PMT3 isoform X2	NA	0.876977	NA	NA	NA	NA	0.552324	-0.469358	1.05797	0.189798	UP2	DS vs UP2	0.552324	0	DS --> UP2	Accumulated with early imbibition	UP2	UP2 vs PRH2	-0.469358	0	UP2 --> PRH2	Detected in unprimed seeds
LOC112416407	XP_024625913.1	serine/arginine-rich splicing factor RS2Z32-like isoform X3	NA	NA	NA	1.66167	NA	1.00474	NA	NA	-0.169587	NA	PRH8	PRH2 vs PRH8	1.00474	0	PRH2 --> PRH8	Accumulated with late reimbibition
MTR_1g019620	XP_024631126.1	cytosolic Fe-S cluster assembly factor NBP35	-0.69876	0.449619	-1.15573	NA	NA	-1.05106	-0.410871	1.0262	-0.129585	0.119293	DS	DS vs PDB4	-1.15573	0	DS --> PDB4	Depleted after priming
MTR_2g010690	XP_024631485.1	pathogenesis-related protein 1	1.05012	NA	-1.13275	NA	1.06212	1.32143	-0.0334278	-0.0513453	0.66298	0.643331	DS	DS vs PDB4	-1.13275	0	DS --> PDB4	Depleted after priming	PRH2	PDB4 vs PRH2	1.06212	0	PDB4 --> PRH2	Accumulated with early reimbibition
MTR_2g094160	XP_024632500.1	4-hydroxy-3-methylbut-2-en-1-yl diphosphate synthase (ferredoxin)	0.0277381	-0.212868	NA	NA	0.852835	1.34852	-0.453071	0.446887	0.83097	0.986511	PRH2	PDB4 vs PRH2	0.852835	0	PDB4 --> PRH2	Accumulated with early reimbibition
MTR_4g108140	XP_024636983.1	protein IQ-DOMAIN 31 isoform X2	1.32154	-0.458775	NA	-1.06214	NA	NA	NA	NA	0.31646	-0.11912	PDB2	PDB2 vs PDB4	-1.06214	0	PDB2 --> PDB4	Depleted with late desiccation
MTR_6g053510	XP_024641274.1	SPX domain-containing membrane protein At4g22990 isoform X1	1.48224	-0.211915	NA	0.0853192	-0.738826	0.795165	NA	-0.263971	0.0816585	NA	PRH2	UP2 vs PRH2	-0.263971	0	UP2 --> PRH2	Detected in unprimed seeds
MTR_6g071595	XP_024641908.1	annexin D5	-0.341085	0.264893	-2.21203	NA	2.07812	-0.349946	-0.28358	0.146067	-0.308166	0.116206	DS	DS vs PDB4	-2.21203	0	DS --> PDB4	Depleted after priming	PRH2	PDB4 vs PRH2	2.07812	0	PDB4 --> PRH2	Accumulated with early reimbibition
																significant
